# Supplementary material for: Imaging practice in low-grade gliomas among European specialized centers and proposal for a minimum core of imaging
Source: PubMed Central journal article supplement (PMC6132968; doi:10.1007/s11060-018-2916-3), 2018-07-10
Supplement: 11060_2018_2916_MOESM1_ESM.pdf [file 11060_2018_2916_MOESM1_ESM.pdf]

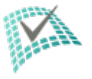

## Questionnaire European Low Grade Glioma Network

Type of Hospital:

- academic
  communal
  private (including private practice)

What is the total amount of diffuse low-grade gliomas (dLGG) in your practice per year?

Country of practice:

Do you have a dedicated „LGG-program“ in your practice?

- Yes
  No

When do you discuss a case in a dedicated interdisciplinary board (tumor-board)?

- Never
  Before every surgery
  After every surgery

If adjuvant treatment is advocated

Which specialities are present in your interdisciplinary (tumor-) board?

- Neurosurgery
  Neurology (Neurooncologists)
  Medical Oncology  
 Radiation Oncology
  Nuclear Medicine
  Neuroradiology  
 Neuropathology

In your routine practice, do you use external imaging?

- No, we always scan our own protocol.
  Yes, if the imaging was done in a neuroradiology center (University Hospital)
  Yes, we use any recent MRI

What is contained in your standard imaging protocol?

- T1 with / without Gd-contrast
  T2
  TIRM  
 FLAIR
  3D-Flair
  T2\*  
 Susceptibility weighted Imaging (SWI)
  Perfusion weighted Imaging (PWI)
  Diffusion weighted Imaging (DWI)  
 ADC
  Perfusion
  single voxel 1H-spectroscopy  
 multivoxel 1H-spectroscopy
  fMRT
  resting stare fMRT

Do you always use the identical MRI scanner for one patient during follow-up investigations?

- Yes
  No
  Mostly yes
  Mostly no

Do you always use a 3T scanner?

- Yes, always
  If available, we use a 3T scanner
  No, 1,5 T is acceptable

What is the standard imaging slice thickness for T1 imaging in LGG?

- <1.5 mm
  1.6 - 3 mm
  3 mm

What is the standard imaging slice thickness for T2 imaging in LGG?

- <1.5 mm
  1.6 - 3 mm
  3 mm

Do you obtain 1H spectroscopy of both hemispheres?

- Yes
  No

Do you perform amino acid PET in suspected low-grade glioma?

- Yes
  No

If the initial amino acid PET was negative, do you perform follow-up amino acid PET imaging?

- Yes
  No

For assessment of treatment response and progression you use?

- MRI only
  amino acid PET only (if initial PET was positive)
  always MRI + aaPET (if initial PET was positive)

- always MRI + aaPET (regardless of initial PET)

## Questionnaire European Low Grade Glioma Network [Fortsetzung]

How do you detect anaplastic transformation?

- T1 w/o contrast                       Perfusion weighted imaging                       1H spectroscopy  
 FET-PET                                       other

If other, please specify

How do you rate the following combination of characteristics in your department: (1) a decrease of the area of non-enhancing lesion on T2 or FLAIR imaging between 25% - 50% compared with baseline; (2) no new lesions, no new T2 or FLAIR abnormalities apart from those consistent with radiation effect, and no new or increase enhancement; and (3) patients should be on a corticosteroid dose that should not be greater than the dose at time of baseline scan, and should be stable or improved clinically.

- Complete Response                       Partial Response                       Minor Response  
 Stable Disease                               Progression

Do you analyze DTI for 3D-fiber tracking in every patient?

- Yes                                               No

What software do you use for analysis of DTI?

Which mathematical model do you use for analysis?

- Unknown                                       Probabilistic approach (including the uncertainty of the estimation, which results in probability maps representing the likelihood of a voxel being part of a fiber and provides the multiple possible fiber directions emanating from each seed)                       Deterministic approach (Deterministic tractography aims to model the data and, in practical terms, can be thought of as generating/reconstructing one fiber from each seed)
- Atlas based

If you do fMRI, is it only for clinical answers or research?

- clinical only                               research only                               both clinical and research  
 for didactic purpose

Which fMRI paradigms do you use routinely?

- motor paradigm (i.e. finger tapping)                       somatosensory stimulation                       speech - word generation / naming task  
 speech - synonyms / odd one out                       speech - semantic comparison                       other

If other, please specify

Do you routinely analyze resting state fMRI?

- Yes                                               No

If you would have to choose between fMRI, navigated transcranial stimulation (nTMS) and direct cortical stimulation (DCS), what would you prefer?

- fMRT                                               nTMS                                               DCS

If you do navigated transcranial magnet stimulation (nTMS), is it only for clinical answers or research?

- clinical only                               research only                               both clinical and research

How does your decision on nTMS influence your daily practice?

- more awake surgery                       more intraoperative monitoring                       more resective surgery  
 less resective surgery or biopsy                       less awake surgery                       less intraoperative monitoring  
 doesn't influence at all

Do you use the exact RANO criteria (van den Bent, Wefel et al. 2011) for LGG?

- always                                               mostly                                               almost never  
 never

Do you always assess follow-up imaging by:

- volumetric analysis (segmentation)                       volumetric analysis (approximation)                       linear measurement in 3 axes of the MRI

- deformation of the lesions / changes in shape

## Questionnaire European Low Grade Glioma Network [Fortsetzung]

Who does the measurements?

- Neurosurgeon
  Neurooncologist
  Neuroradiologist  
 All members of the team

Are measurements always done by the same investigator?

- Yes
  No

What is your imaging interval in weeks in cases of diffuse low-grade glioma (without suspected transformation) with:  
no remnant

10ml tumor remnant

11 - 15ml tumor remnant

> 15ml remnant

unresectable LGG

Does this interval vary according to the growth rate?

- Yes
  No

Do you perform longitudinal fMRI study (e.g. before and after surgery) to investigate neuroplasticity?

- Yes
  No

Do you combine different methodologies to increase the reliability of functional imaging - as for example fMRI or TMS and DTI?

- Yes
  No

Do you use a databank of all MRIs in DICOM format?

- Yes, on hospital PACS
  Yes, on Harddrive
  No

Do you use magnetoencephalography (MEG) in your center?

- for language mapping
  for language lateralization
  for motor mapping  
 we have one but do not use it
  we don't have a MEG

What is your opinion on MEG in general:

- we currently try to get one
  I don't see any value for neuro-oncology
  It is a crucial technique for clinical decision making  
 It is nice to have but you don't really need it
  It is clinically not relevant but scientifically interesting, even for neuro-oncology

Beyond clinical considerations, do you work with a research team involved in neuroimaging?

- Yes, Biostatisticians
  Yes, Bioinformaticians
  Yes, Physicists  
 Yes, Mathematicians
  No

### Bibliography

van den Bent, M. J., J. S. Wefel, D. Schiff, M. J. B. Taphoorn, K. Jaeckle, L. Junck, T. Armstrong, A. Choucair, A. D.

Waldman, T. Gorlia, M. Chamberlain, B. G. Baumert, M. A.

Vogelbaum, D. R. Macdonald, D. A. Reardon, P. Y. Wen, S. M. Chang and A. H. Jacobs (2011). "Response assessment in neuro-oncology (a report of the RANO group): assessment of outcome in trials of diffuse low-grade gliomas." The Lancet Oncology 12(6): 583-593.
